# Supplementary material
Source: HighWire-hosted journal article supplement (https://erj.ersjournals.com/content/55/6/2000189)
Supplement: inline-supplementary-material-1 [file inline-supplementary-material-1.pdf]

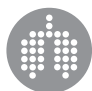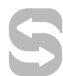

SHAREABLE PDF

# Diagnosis of chronic thromboembolic pulmonary hypertension after acute pulmonary embolism

Fredrikus A. Klok <sup>1</sup>, Francis Couturaud<sup>2</sup>, Marion Delcroix <sup>3</sup> and Marc Humbert <sup>4,5,6</sup>

**Affiliations:** <sup>1</sup>Dept of Thrombosis and Hemostasis, Leiden University Medical Center, Leiden, The Netherlands. <sup>2</sup>Département de Médecine Interne et Pneumologie, Centre Hospitalo-Universitaire de Brest, Univ Brest, Brest, France. <sup>3</sup>Dept of Respiratory Diseases, University Hospitals and Respiratory Division, Dept of Chronic Diseases, Metabolism and Aging, KU Leuven – University of Leuven, Leuven, Belgium. <sup>4</sup>Université Paris-Saclay, Faculté de Médecine, Le Kremlin-Bicêtre, France. <sup>5</sup>Service de Pneumologie et Soins Intensifs Respiratoires, Hôpital Bicêtre, AP-HP, Le Kremlin-Bicêtre, France. <sup>6</sup>INSERM UMR S 999, Hôpital Marie Lannelongue, Le Plessis Robinson, France.

**Correspondence:** Frederikus A. Klok, Dept of Thrombosis and Hemostasis, Leiden University Medical Center, Albinusdreef 2, 2300RC, Leiden, The Netherlands. E-mail: f.a.klok@LUMC.nl

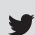

@ERSpublications

**Improving education of PE caretakers, higher awareness for CTEPH and further validation and implementation of clinical/radiological algorithms for earlier CTEPH diagnosis will help ensure earlier referral to expert centres and improved prognosis** <http://bit.ly/2Qb9jOt>

**Cite this article as:** Klok FA, Couturaud F, Delcroix M, *et al.* Diagnosis of chronic thromboembolic pulmonary hypertension after acute pulmonary embolism. *Eur Respir J* 2020; 55: 2000189 [https://doi.org/10.1183/13993003.00189-2020].

This single-page version can be shared freely online.

**ABSTRACT** Chronic thromboembolic pulmonary hypertension (CTEPH) is the most severe long-term complication of acute pulmonary embolism (PE). Untreated CTEPH is fatal, but, if diagnosed in time, successful surgical (pulmonary endarterectomy), medical (pulmonary hypertension drugs) and/or interventional (balloon pulmonary angioplasty) therapies have been shown to improve clinical outcomes, especially in case of successful pulmonary endarterectomy. Early diagnosis has however been demonstrated to be challenging. Poor awareness of the disease by patients and physicians, high prevalence of the post-PE syndrome (*i.e.* persistent dyspnoea, functional limitations and/or decreased quality of life following an acute PE diagnosis), lack of clear guideline recommendations as well as inefficient application of diagnostic tests in clinical practice lead to a reported staggering diagnostic delay >1 year. Hence, there is a great need to improve current clinical practice and diagnose CTEPH earlier. In this review, we will focus on the clinical presentation of and risk factors for CTEPH, and provide best practices for PE follow-up programmes from expert centres, based on a clinical case.
